# Supplementary material
Source: PubMed Central journal article supplement (PMC439002)

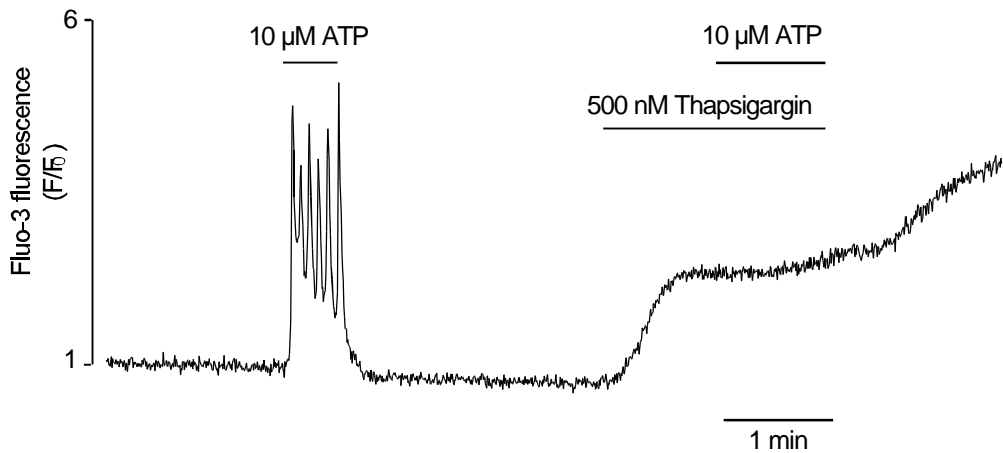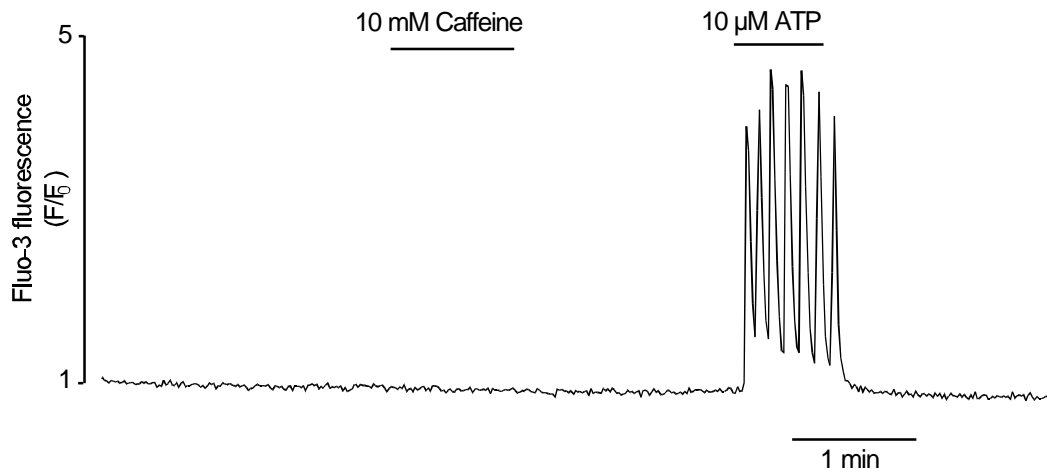

Supplement: pnas_101_25_9479__2.pdf [file pnas_101_25_9479__2.pdf]

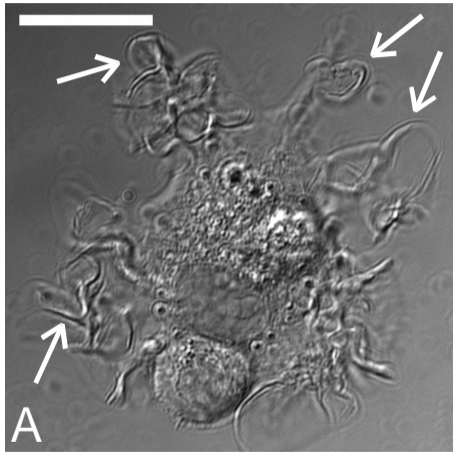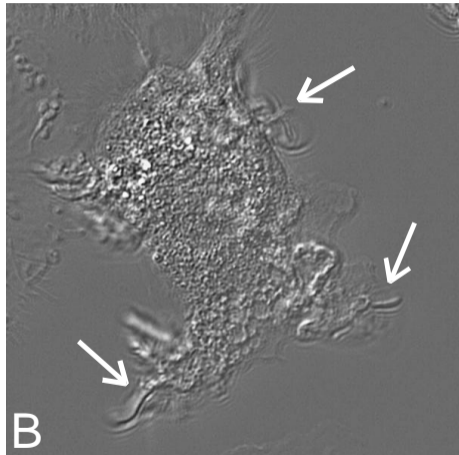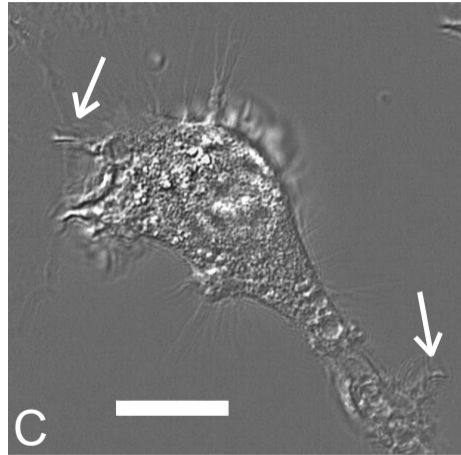

Supplement: pnas_101_25_9479__3.pdf [file pnas_101_25_9479__3.pdf]

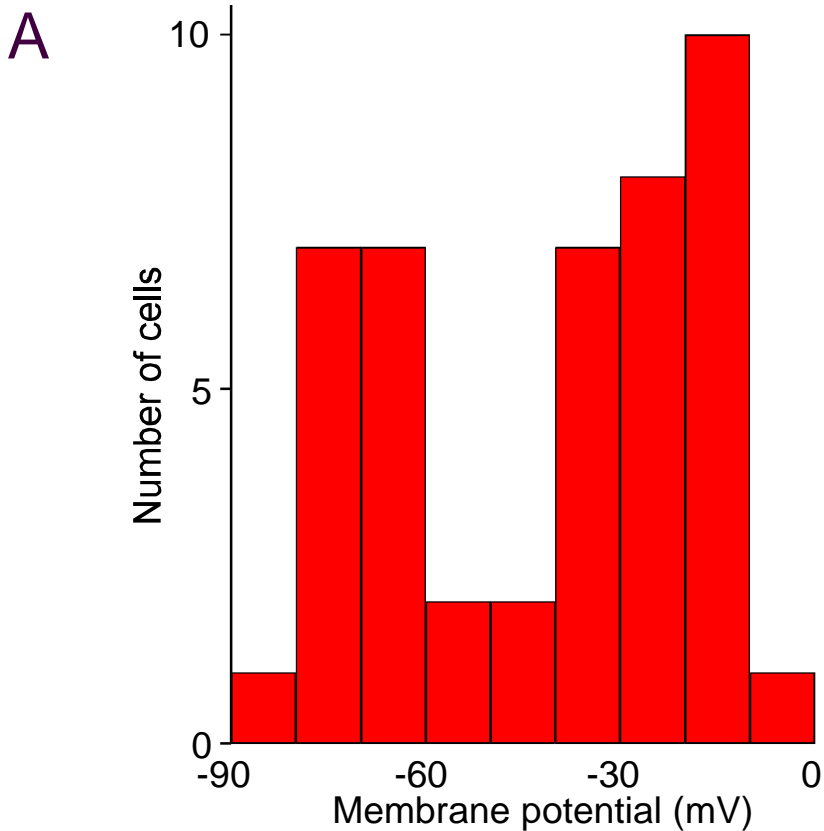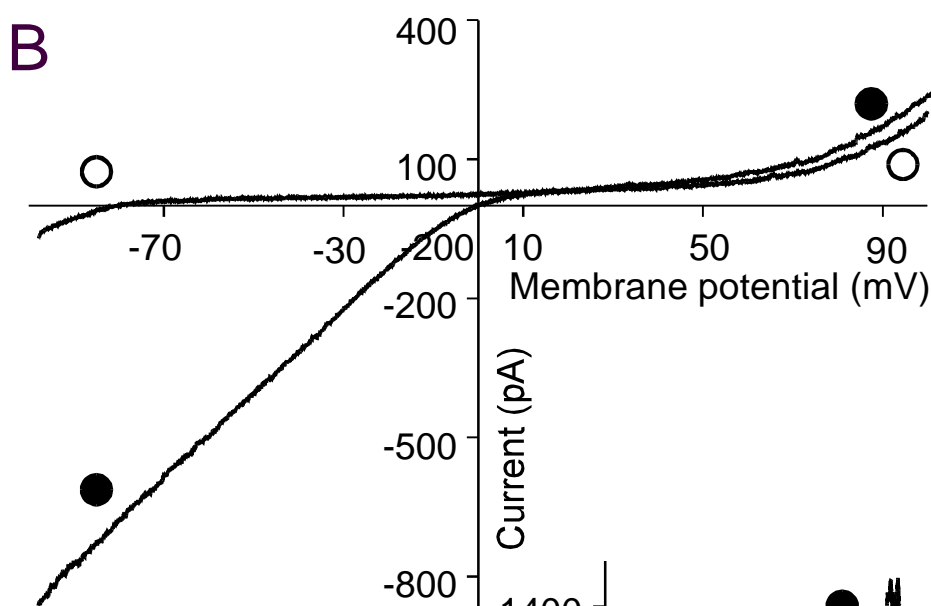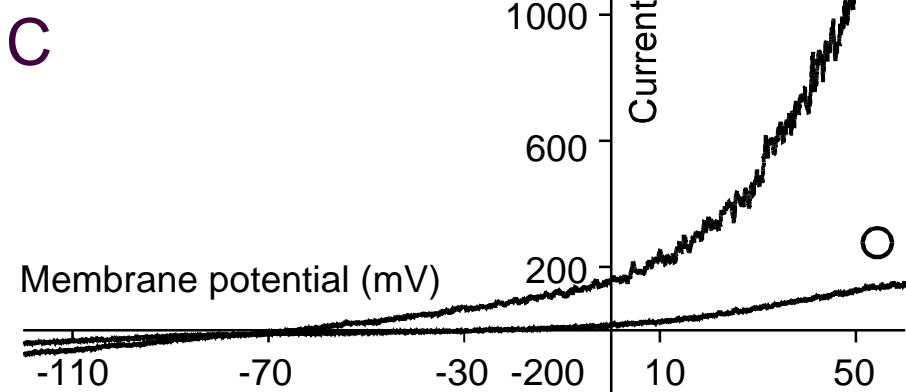

Supplement: pnas_101_25_9479__4.pdf [file pnas_101_25_9479__4.pdf]

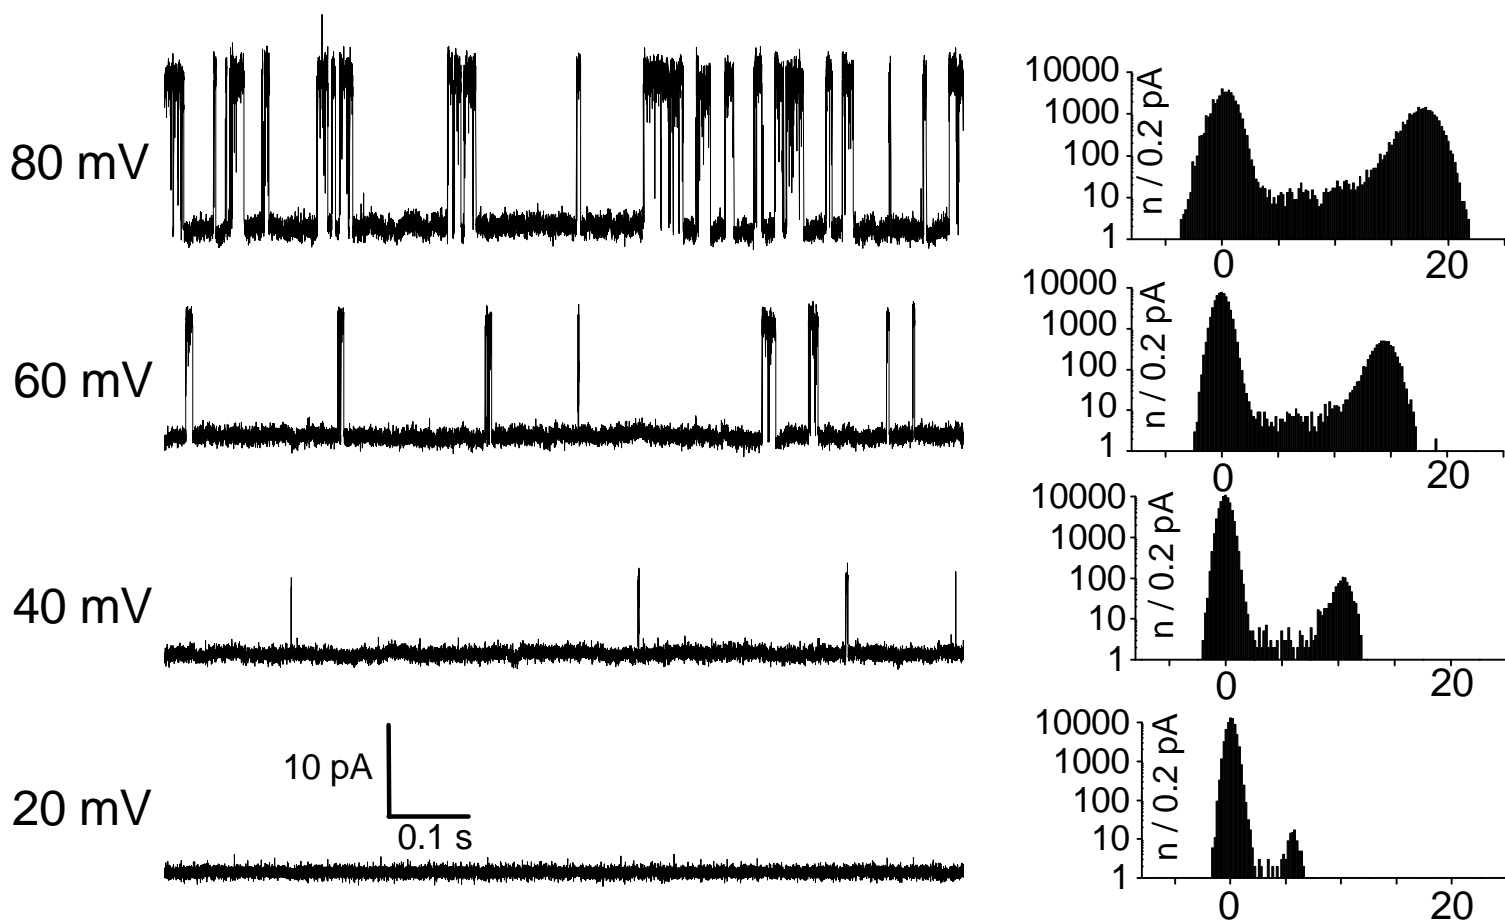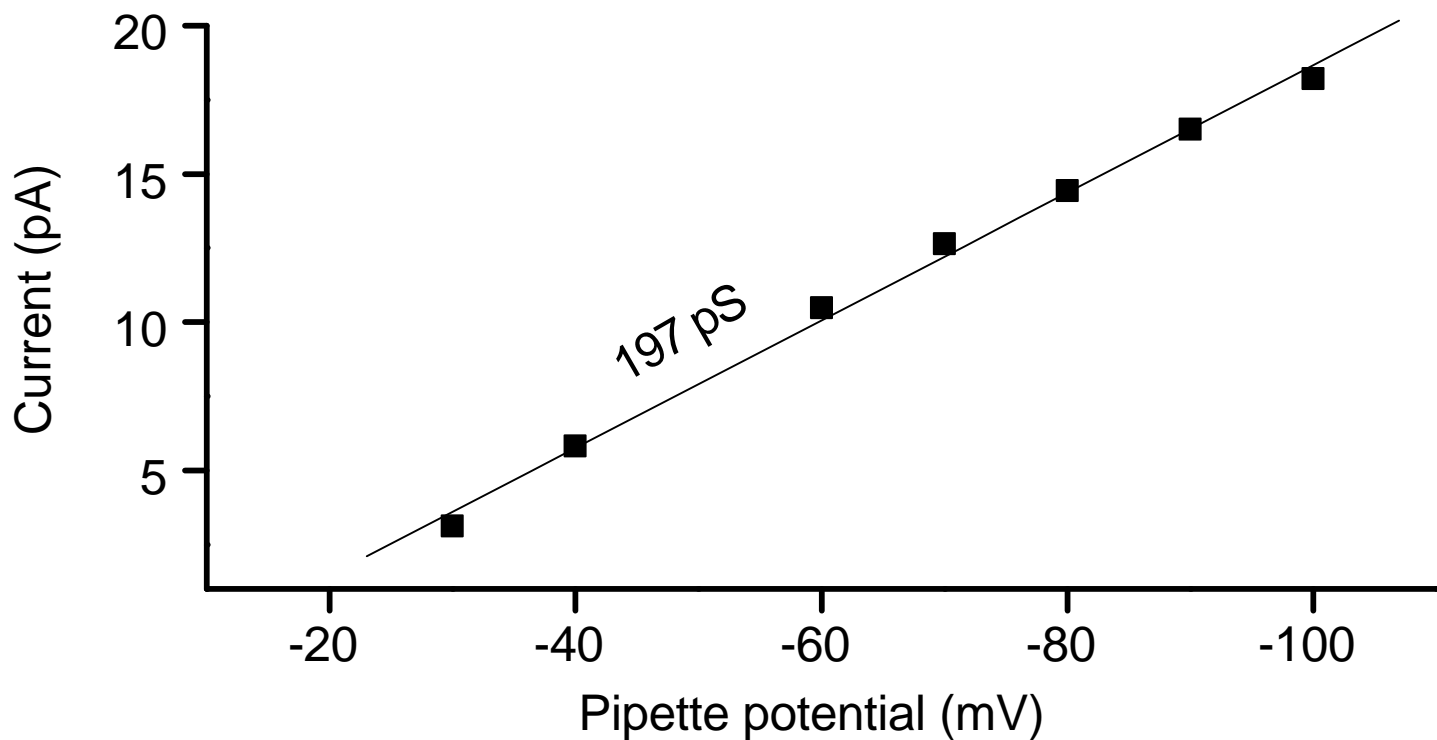

Supplement: pnas_101_25_9479__5.pdf [file pnas_101_25_9479__5.pdf]
